# Supplementary material for: Integrated bidirectional and polarization-sensitive photodetection in a ReSe 2 /graphene/WSe 2 heterostructure
Source: Royal Society of Chemistry journal article supplement (doi:10.1039/d5tc03830h), 2026-01-01
Supplement: d5tc03830h1.pdf [file d5tc03830h1.pdf]

## Supplementary Information

### Integrated Bidirectional and Polarization-Sensitive Photodetection in ReSe<sub>2</sub>/graphene/WSe<sub>2</sub> Heterostructure

*Yujue Yang<sup>a#</sup>, Zhidong Pan<sup>b#</sup>, Xin Zhang<sup>a\*</sup>, Fengen Wu<sup>c</sup>, Huafeng Dong<sup>a\*</sup>*

<sup>a</sup>School of Physics and Optoelectronic Engineering, Guangdong University of Technology, Guangzhou 510006, P. R. China

E-mail: [yujue@gdut.edu.cn](mailto:yujue@gdut.edu.cn)

<sup>b</sup>Guangdong Provincial Key Laboratory of Chip and Integration Technology, School of Electronic Science and Engineering, South China Normal University, Foshan 528225, P. R. China

<sup>c</sup>School of Materials and Energy, Guangdong University of Technology, Guangzhou 510006, P. R. China.

<sup>#</sup>These authors contributed equally to this work.

\*Corresponding authors: Yujue Yang ([yujue@gdut.edu.cn](mailto:yujue@gdut.edu.cn)); Xin Zhang ([phxzhang@gdut.edu.cn](mailto:phxzhang@gdut.edu.cn)); Huafeng Dong ([hfdong@gdut.edu.cn](mailto:hfdong@gdut.edu.cn))

**Note S1:** Calculation of surface potential difference (SPD)

The SPD between ReSe<sub>2</sub>, Gr, and 2H-WSe<sub>2</sub> under dark conditions is extracted by Kelvin probe force microscopy (KPFM). Here, the SPD between the probe tip, ReSe<sub>2</sub>, Gr, and 2H-WSe<sub>2</sub> can be followed as:

$$eSPD_{ReSe_2} = (W_{tip} - W_{ReSe_2}) = 787 \text{ meV}$$

$$eSPD_{Gr} = (W_{tip} - W_{Gr}) = 690 \text{ meV}$$

$$eSPD_{WSe_2} = (W_{tip} - W_{WSe_2}) = 675 \text{ meV}$$

where  $e$  stands for elementary charge, and  $W_{tip}$ ,  $W_{ReSe_2}$ ,  $W_{Gr}$ , and  $W_{2H-WSe_2}$  represent the work function of the KPFM tip, ReSe<sub>2</sub>, Gr, and 2H-WSe<sub>2</sub>, respectively. Obviously, the Fermi level difference ( $\Delta E_f$ ) between ReSe<sub>2</sub>/Gr and Gr/2H-WSe<sub>2</sub> is given by.

$$\Delta E_{f1} = eSPD_{Gr} - eSPD_{ReSe_2} = W_{ReSe_2} - W_{Gr} = -97 \text{ meV}$$

$$\Delta E_{f2} = eSPD_{WSe_2} - eSPD_{Gr} = W_{Gr} - W_{WSe_2} = -15 \text{ meV}$$

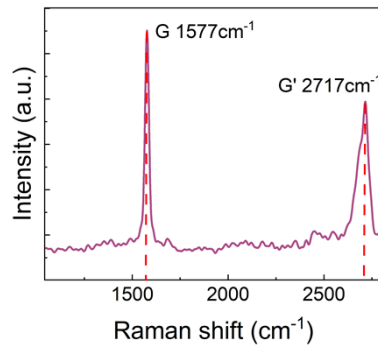

**Fig. S1** Raman spectra of Graphene.

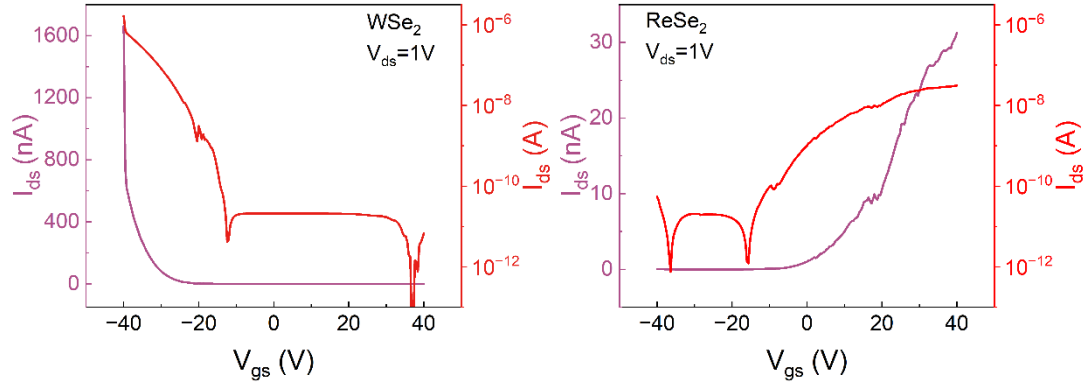

**Fig. S2** The transfer characteristic curves for WSe<sub>2</sub> and ReSe<sub>2</sub>, respectively.

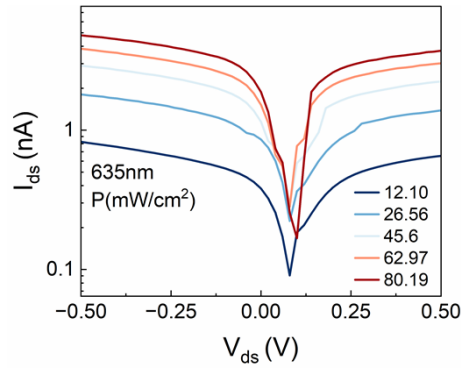

**Fig. S3.** Device performance in logarithmic coordinates at different optical power levels.

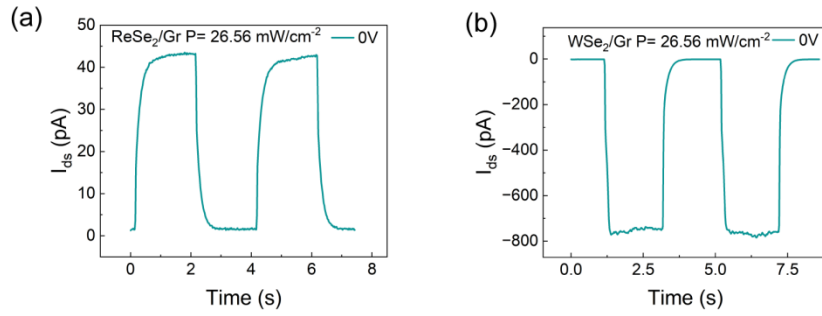

**Fig. S4** I-T curves for different Schottky junctions (all connection graphene at the source electrode).
